# Supplementary material for: Isolation and identification of bioactive compounds in Andrographis paniculata (Chuanxinlian)
Source: Springer Nature journal article supplement (doi:10.1186/1749-8546-5-17), 2010-01-01
Supplement: 13020_2010_76_MOESM1_ESM.pdf [file 13020_2010_76_MOESM1_ESM.pdf]

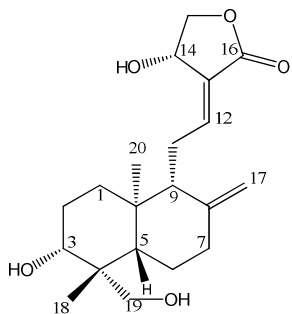

**andrographolide**

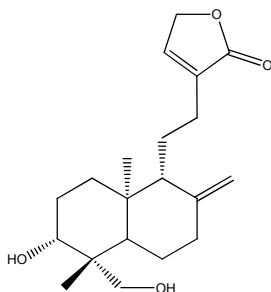

**14-deoxyandrographolide**

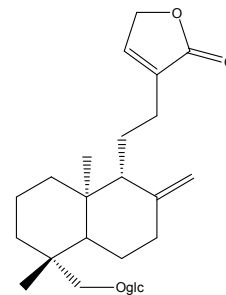

**neoandrographolide**

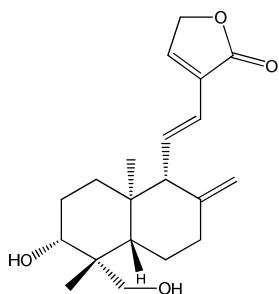

**14-deoxy-11,12-didehydroandrographolide**

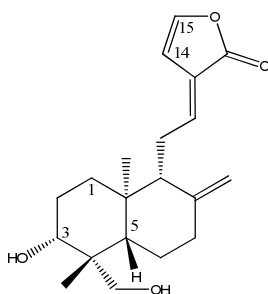

**14-deoxy-14,15-didehydroandrographolide**

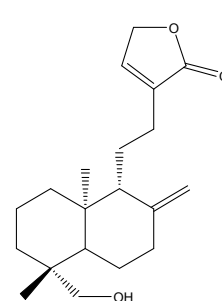

**andrograpanin**

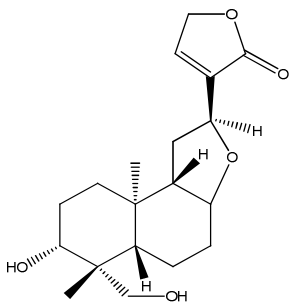

**isoandrographolide**

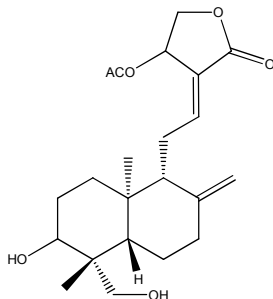

**14-acetylandrographolide**

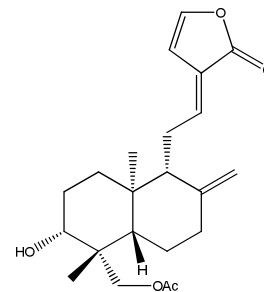

**19-O-acetylanhydroandrographolide**
