# Supplementary material for: Isolation and identification of bioactive compounds in Andrographis paniculata (Chuanxinlian)
Source: Springer Nature journal article supplement (doi:10.1186/1749-8546-5-17), 2010-01-01
Supplement: 13020_2010_76_MOESM4_ESM.pdf [file 13020_2010_76_MOESM4_ESM.pdf]

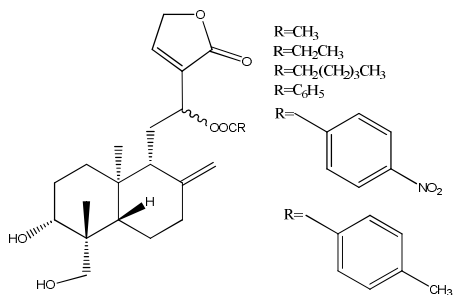

**Derivatives of**

**12-hydroxy-14-dehydroandrographolide**

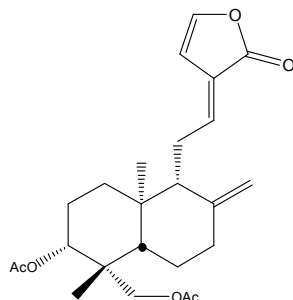

**3,19-O-diacetylanhydroandrographolide**

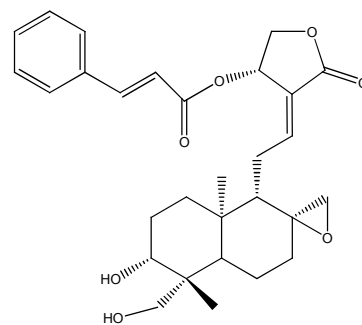

**DRF3188**

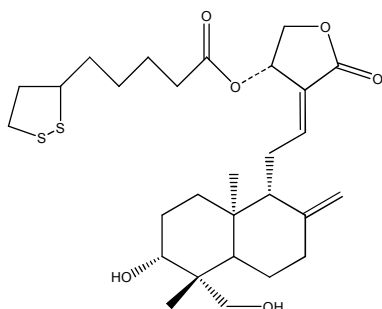

**14-Alpha-lipoyl andrographolide**

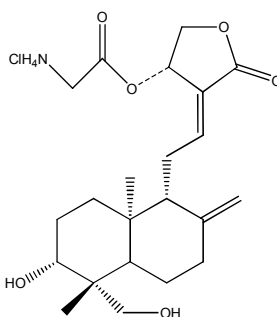

**14-Glycyl andrographolide  
hydrochloride**

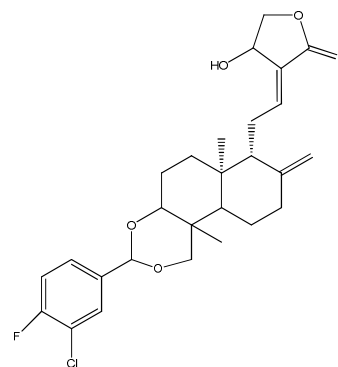

**SRJ23**

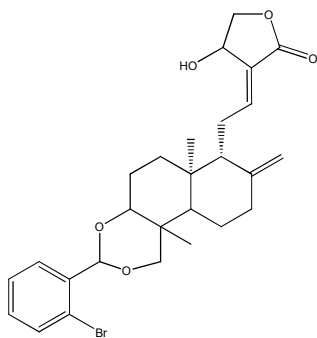

**SRJ09**

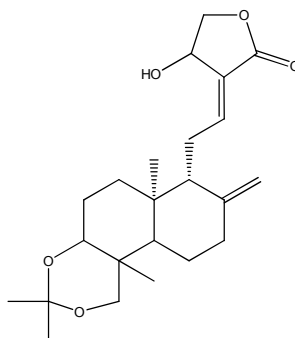

**3,19-isopropylideneandrographolide**

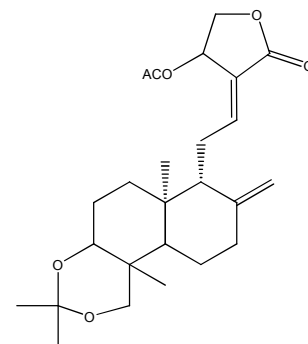

**14-acetyl-3,19-isopropylidene  
andrographolide**
