# Supplementary figures and images for: Isolation and identification of bioactive compounds in Andrographis paniculata (Chuanxinlian)
Source: Springer Nature journal article supplement (doi:10.1186/1749-8546-5-17), 2010-01-01

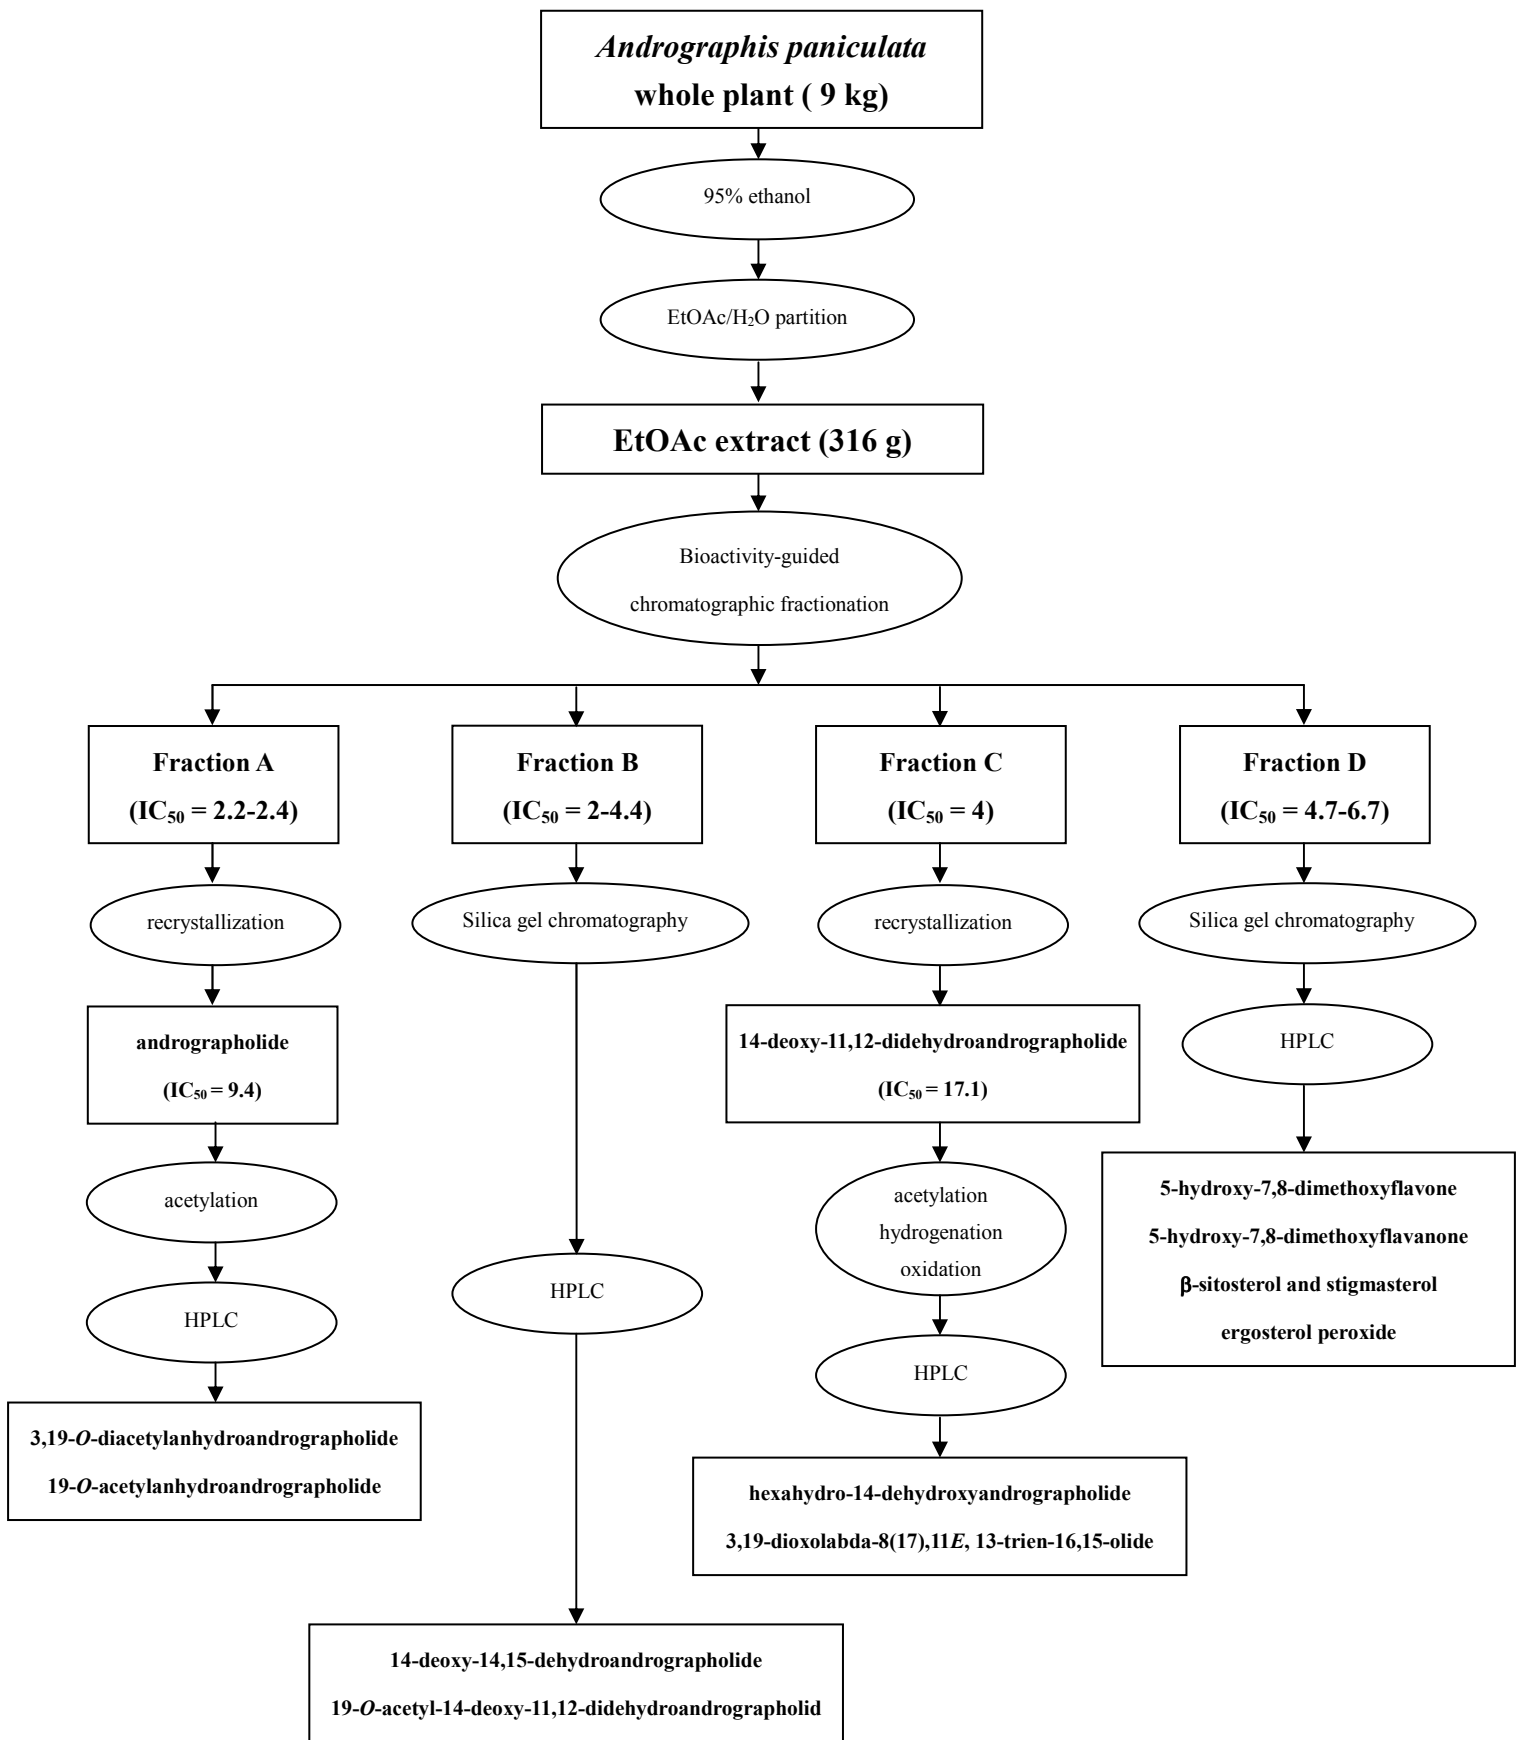

Supplement: 13020_2010_76_MOESM3_ESM.pdf [file 13020_2010_76_MOESM3_ESM.pdf]
